# Supplementary material
Source: MDPI journal article supplement (https://www.mdpi.com/1424-2818/5/1/73)
Supplement: s1 [file s1]

**Supplementary Material 1.** ITS1 and ITS2 sequence and OTU numbers obtained from each soil sample.

|  | Raw sequences | | Filtered sequences | | Denoised sequences | | 97% sequ. id. OTUs1 | | | |
| --- | --- | --- | --- | --- | --- | --- | --- | --- | --- | --- |
|  |  |  |  |  |  |  | Total no. | | Singletons | |
|  | **ITS1** | **ITS2** | **ITS1** | **ITS2** | **ITS1** | **ITS2** | **ITS1** | **ITS2** | **ITS1** | **ITS2** |
| **WTG1** | 2695 | 872 | 1475 | 448 | 1470 | 447 | 232 | 142 | 69 | 53 |
| **WTG2** | 1089 | 0 | 583 | 0 | 583 | 0 | 97 | 0 | 26 | 0 |
| **WTG3** | 2946 | 1629 | 1741 | 936 | 1739 | 934 | 173 | 120 | 37 | 36 |
| **BTG1** | 4101 | 3676 | 2703 | 2428 | 2700 | 2426 | 336 | 338 | 104 | 108 |
| **BTG2** | 5160 | 2851 | 3108 | 1821 | 3103 | 1818 | 385 | 278 | 98 | 80 |
| **SAR1** | 947 | 738 | 562 | 365 | 562 | 363 | 104 | 94 | 38 | 40 |
| **SAR2** | 405 | 296 | 254 | 158 | 254 | 158 | 72 | 71 | 29 | 28 |
| **SAR3** | 1036 | 1198 | 597 | 685 | 594 | 684 | 120 | 119 | 46 | 37 |
| **SAR4** | 1706 | 1642 | 1082 | 1172 | 1082 | 1167 | 103 | 118 | 28 | 33 |
| **SAR5** | 1027 | 907 | 569 | 548 | 569 | 548 | 81 | 82 | 19 | 33 |
| **SER1** | 1736 | 940 | 820 | 628 | 818 | 628 | 128 | 102 | 37 | 36 |
| **SER2** | 2226 | 707 | 944 | 397 | 943 | 397 | 119 | 81 | 35 | 34 |
| **SER3** | 2165 | 946 | 1030 | 588 | 1028 | 587 | 234 | 131 | 78 | 50 |
| **SER4** | 1957 | 1008 | 664 | 652 | 663 | 649 | 171 | 108 | 53 | 38 |
| **CIS1** | 709 | 1914 | 385 | 236 | 385 | 233 | 108 | 59 | 39 | 25 |
| **CIS2** | 2768 | 2343 | 265 | 196 | 265 | 195 | 63 | 80 | 20 | 45 |
| **Total no.** | **32673** | **21667** | **16782** | **11258** | **16758** | **11234** | **1660** | **1393** | **756** | **676** |

1, following rarefaction to even sequencing depth for each ITS region (254 and 158 ITS1 and ITS2 sequences per sample, respectively).
