# Supplementary material
Source: MDPI journal article supplement (https://www.mdpi.com/1424-2818/5/1/73)

**Supplementary Material 2.** Presence of ITS1 (black bars) and ITS2 (grey bars) OTUs in different proportions of the soil samples, across all samples examined (**a**) and (**b)** for each sample group.


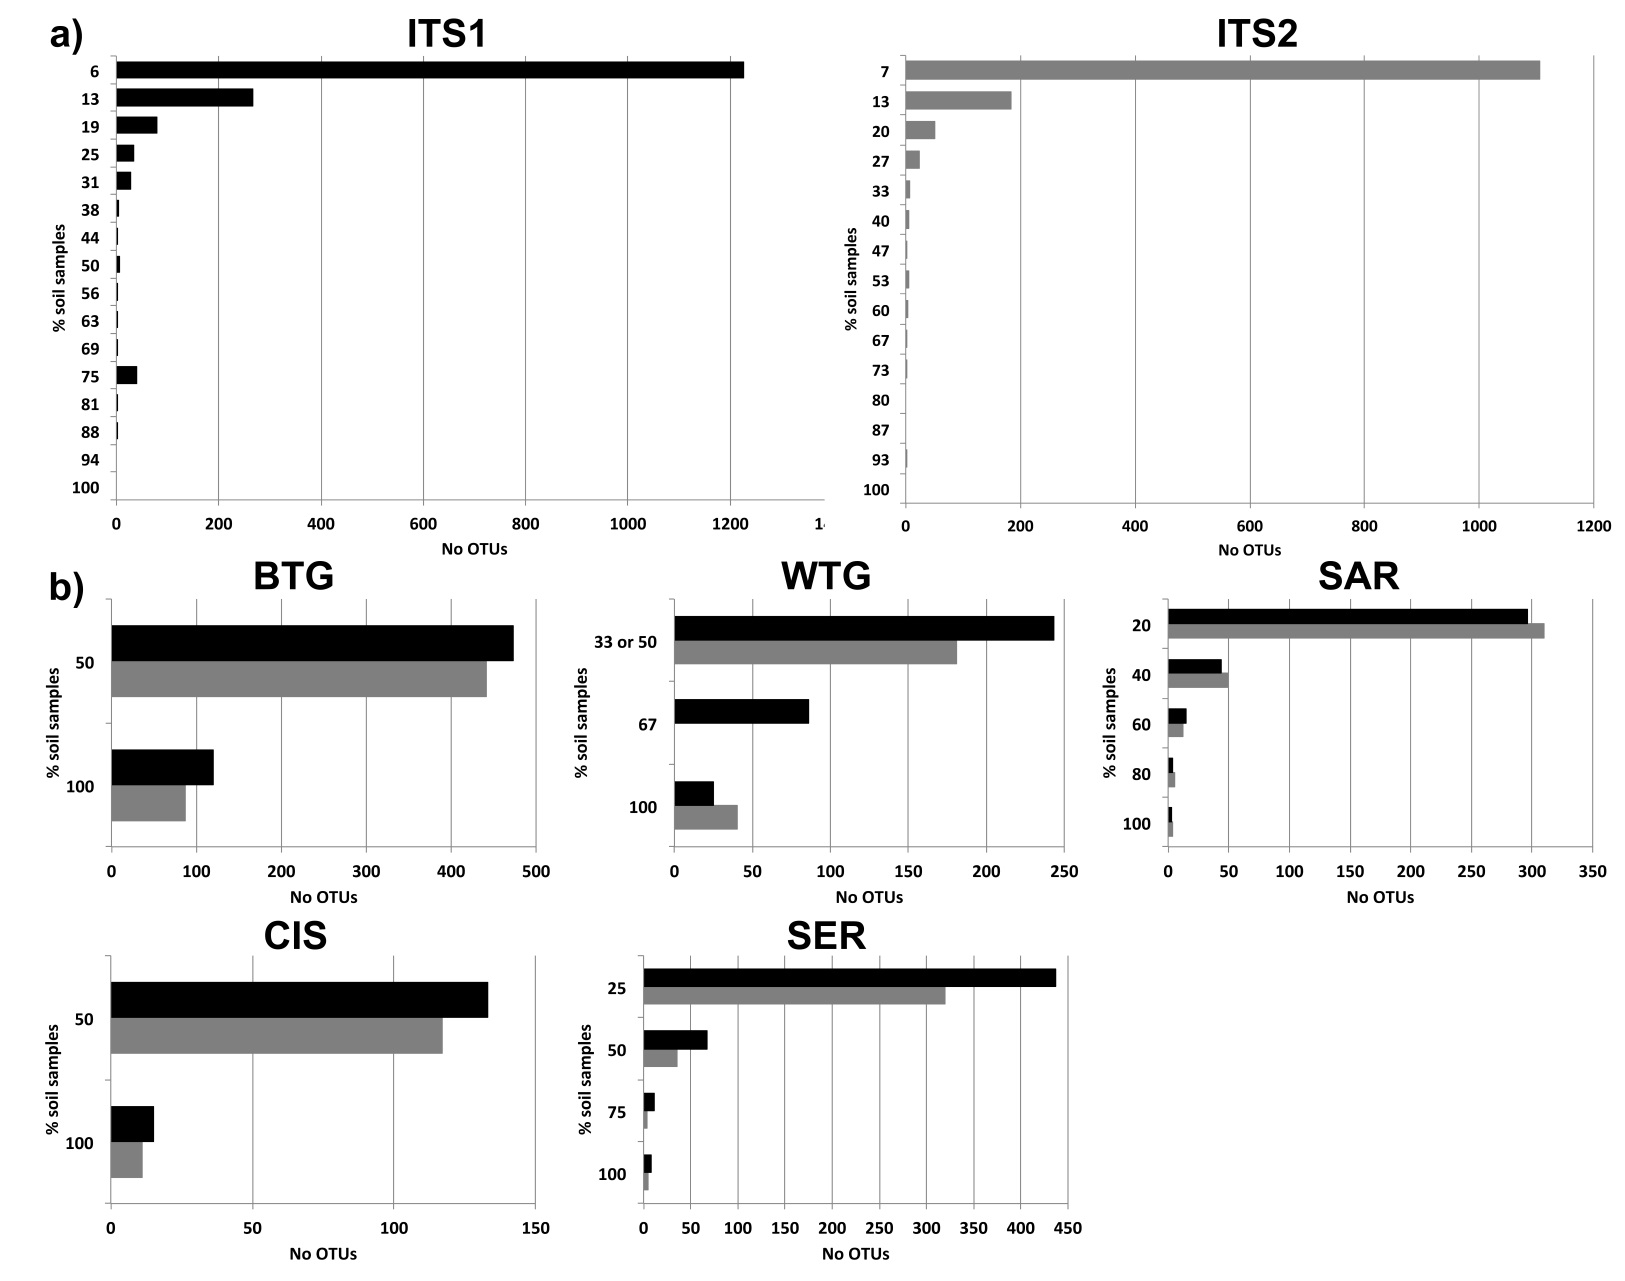

Supplement: s2 [file s2]
